# Supplementary material for: Compartment-specific investigations of antioxidants and hydrogen peroxide in leaves of Arabidopsis thaliana during dark-induced senescence
Source: PubMed Central journal article supplement (PMC4859865; doi:10.1007/s11738-016-2150-6), 2016-05-06
Supplement: 11738_2016_2150_MOESM5_ESM.pdf [file 11738_2016_2150_MOESM5_ESM.pdf]

| mg<br>g <sup>-1</sup> FW            | Chlorophyll a     |               |               | Chlorophyll b       |               |               | Days in<br>darkness |
|-------------------------------------|-------------------|---------------|---------------|---------------------|---------------|---------------|---------------------|
|                                     | Col-0             | <i>pad2-1</i> | <i>vtc2-1</i> | Col-0               | <i>pad2-1</i> | <i>vtc2-1</i> |                     |
| 0 d                                 | a                 | a             | a             | a                   | b             | b             | 0 d                 |
| 1 d                                 | ab                | b             | a             | ab                  | b             | a             | 1 d                 |
| 2 d                                 | a                 | b             | a             | a                   | b             | a             | 2 d                 |
| 4 d                                 | a                 | b             | a             | a                   | c             | b             | 4 d                 |
| 7 d                                 | b                 | a             | b             | a                   | b             | b             | 7 d                 |
| 10 d                                | a                 | a             | a             | ab                  | b             | a             | 10 d                |
| mg<br>g <sup>-1</sup> FW            | Carotenoids       |               |               | Total chlorophyll   |               |               | Days in<br>darkness |
|                                     | Col-0             | <i>pad2-1</i> | <i>vtc2-1</i> | Col-0               | <i>pad2-1</i> | <i>vtc2-1</i> |                     |
| 0 d                                 | a                 | b             | b             | a                   | b             | b             | 0 d                 |
| 1 d                                 | ab                | b             | a             | a                   | a             | b             | 1 d                 |
| 2 d                                 | a                 | b             | a             | a                   | a             | b             | 2 d                 |
| 4 d                                 | ab                | c             | b             | a                   | b             | ab            | 4 d                 |
| 7 d                                 | a                 | b             | b             | a                   | b             | b             | 7 d                 |
| 10 d                                | a                 | a             | a             | a                   | a             | a             | 10 d                |
| Number of<br>chloroplasts           | Spongy parenchyma |               |               | Palisade parenchyma |               |               | Days in<br>darkness |
|                                     | Col-0             | <i>pad2-1</i> | <i>vtc2-1</i> | Col-0               | <i>pad2-1</i> | <i>vtc2-1</i> |                     |
| 0 d                                 | a                 | b             | c             | b                   | a             | a             | 0 d                 |
| 1 d                                 | b                 | a             | b             | a                   | a             | a             | 1 d                 |
| 2 d                                 | a                 | a             | b             | a                   | b             | c             | 2 d                 |
| 4 d                                 | a                 | a             | a             | a                   | a             | a             | 4 d                 |
| 7 d                                 | a                 | b             | c             | a                   | b             | c             | 7 d                 |
| 10 d                                | a                 | a             | -             | a                   | a             | -             | 10 d                |
| Total of area<br>in $\mu\text{m}^2$ | Plastids          |               |               | Thylakoids          |               |               | Days in<br>darkness |
|                                     | Col-0             | <i>pad2-1</i> | <i>vtc2-1</i> | Col-0               | <i>pad2-1</i> | <i>vtc2-1</i> |                     |
| 0 d                                 | a                 | b             | b             | a                   | b             | b             | 0 d                 |
| 1 d                                 | a                 | ab            | b             | a                   | b             | b             | 1 d                 |
| 2 d                                 | a                 | a             | a             | a                   | b             | a             | 2 d                 |
| 4 d                                 | a                 | c             | b             | a                   | b             | b             | 4 d                 |
| 7 d                                 | a                 | b             | a             | a                   | b             | b             | 7 d                 |
| 10 d                                | a                 | b             | -             | a                   | a             | -             | 10 d                |
| Total of area<br>in $\mu\text{m}^2$ | Starch            |               |               | Plastoglobules      |               |               | Days in<br>darkness |
|                                     | Col-0             | <i>pad2-1</i> | <i>vtc2-1</i> | Col-0               | <i>pad2-1</i> | <i>vtc2-1</i> |                     |
| 0 d                                 | a                 | a             | b             | a                   | a             | a             | 0 d                 |
| 1 d                                 | b                 | a             | b             | a                   | a             | a             | 1 d                 |
| 2 d                                 | b                 | a             | b             | a                   | a             | a             | 2 d                 |
| 4 d                                 | a                 | a             | a             | a                   | a             | a             | 4 d                 |
| 7 d                                 | a                 | a             | a             | b                   | a             | b             | 7 d                 |
| 10 d                                | a                 | a             | -             | a                   | a             | -             | 10 d                |

**Table A1**
