# Supplementary material for: Compartment-specific investigations of antioxidants and hydrogen peroxide in leaves of Arabidopsis thaliana during dark-induced senescence
Source: PubMed Central journal article supplement (PMC4859865; doi:10.1007/s11738-016-2150-6), 2016-05-06
Supplement: 11738_2016_2150_MOESM6_ESM.pdf [file 11738_2016_2150_MOESM6_ESM.pdf]

| Mitochondria | Glutathione |               |               | Ascorbate        |               |               | Days in darkness |
|--------------|-------------|---------------|---------------|------------------|---------------|---------------|------------------|
|              | Col-0       | <i>pad2-1</i> | <i>vtc2-1</i> | Col-0            | <i>pad2-1</i> | <i>vtc2-1</i> |                  |
| 0 d          | a           | a             | b             | a                | a             | b             | 0 d              |
| 1 d          | b           | a             | b             | a                | a             | a             | 1 d              |
| 2 d          | b           | a             | b             | a                | b             | b             | 2 d              |
| 4 d          | b           | a             | b             | a                | a             | a             | 4 d              |
| 7 d          | a           | b             | b             | a                | b             | b             | 7 d              |
| 10 d         | a           | b             | -             | a                | b             | -             | 10 d             |
| Plastids     | Glutathione |               |               | Ascorbate        |               |               | Days in darkness |
|              | Col-0       | <i>pad2-1</i> | <i>vtc2-1</i> | Col-0            | <i>pad2-1</i> | <i>vtc2-1</i> |                  |
| 0 d          | b           | c             | a             | a                | a             | b             | 0 d              |
| 1 d          | a           | a             | b             | a                | a             | a             | 1 d              |
| 2 d          | b           | a             | b             | a                | a             | a             | 2 d              |
| 4 d          | b           | a             | b             | a                | a             | b             | 4 d              |
| 7 d          | a           | a             | b             | a                | a             | b             | 7 d              |
| 10 d         | a           | b             | -             | a                | b             | -             | 10 d             |
| Nuclei       | Glutathione |               |               | Ascorbate        |               |               | Days in darkness |
|              | Col-0       | <i>pad2-1</i> | <i>vtc2-1</i> | Col-0            | <i>pad2-1</i> | <i>vtc2-1</i> |                  |
| 0 d          | a           | b             | a             | a                | a             | b             | 0 d              |
| 1 d          | a           | b             | b             | a                | a             | c             | 1 d              |
| 2 d          | a           | a             | a             | a                | a             | c             | 2 d              |
| 4 d          | a           | a             | a             | a                | a             | b             | 4 d              |
| 7 d          | a           | a             | b             | a                | a             | b             | 7 d              |
| 10 d         | a           | b             | -             | b                | b             | -             | 10 d             |
| Peroxisomes  | Glutathione |               |               | Ascorbate        |               |               | Days in darkness |
|              | Col-0       | <i>pad2-1</i> | <i>vtc2-1</i> | Col-0            | <i>pad2-1</i> | <i>vtc2-1</i> |                  |
| 0 d          | b           | c             | a             | a                | a             | b             | 0 d              |
| 1 d          | a           | b             | b             | a                | b             | c             | 1 d              |
| 2 d          | ab          | b             | a             | a                | a             | a             | 2 d              |
| 4 d          | a           | a             | a             | a                | b             | b             | 4 d              |
| 7 d          | a           | a             | a             | a                | ab            | b             | 7 d              |
| 10 d         | a           | a             | -             | a                | b             | -             | 10 d             |
| Cytosol      | Glutathione |               |               | Ascorbate        |               |               | Days in darkness |
|              | Col-0       | <i>pad2-1</i> | <i>vtc2-1</i> | Col-0            | <i>pad2-1</i> | <i>vtc2-1</i> |                  |
| 0 d          | a           | c             | b             | a                | a             | b             | 0 d              |
| 1 d          | a           | b             | b             | b                | a             | c             | 1 d              |
| 2 d          | a           | b             | a             | a                | b             | c             | 2 d              |
| 4 d          | a           | b             | c             | a                | b             | b             | 4 d              |
| 7 d          | a           | a             | a             | a                | b             | b             | 7 d              |
| 10 d         | a           | a             | -             | a                | b             | -             | 10 d             |
| Vacuoles     | Ascorbate   |               |               | Days in darkness |               |               |                  |
|              | Col-0       | <i>pad2-1</i> | <i>vtc2-1</i> |                  |               |               |                  |
| 0 d          | a           | a             | a             | 0 d              |               |               |                  |
| 1 d          | b           | a             | b             | 1 d              |               |               |                  |
| 2 d          | a           | a             | a             | 2 d              |               |               |                  |
| 4 d          | a           | a             | a             | 4 d              |               |               |                  |
| 7 d          | a           | b             | b             | 7 d              |               |               |                  |
| 10 d         | a           | b             | -             | 10 d             |               |               |                  |

**Table A2**
