# Supplementary material for: Compartment-specific investigations of antioxidants and hydrogen peroxide in leaves of Arabidopsis thaliana during dark-induced senescence
Source: PubMed Central journal article supplement (PMC4859865; doi:10.1007/s11738-016-2150-6), 2016-05-06
Supplement: 11738_2016_2150_MOESM7_ESM.pdf [file 11738_2016_2150_MOESM7_ESM.pdf]

| nkat<br>g <sup>-1</sup> FW | CAT   |               |               | GR                  |               |               | Days in<br>darkness |
|----------------------------|-------|---------------|---------------|---------------------|---------------|---------------|---------------------|
|                            | Col-0 | <i>pad2-1</i> | <i>vtc2-1</i> | Col-0               | <i>pad2-1</i> | <i>vtc2-1</i> |                     |
| 0 d                        | b     | ab            | a             | a                   | b             | a             | 0 d                 |
| 1 d                        | c     | b             | a             | a                   | b             | a             | 1 d                 |
| 2 d                        | a     | a             | a             | a                   | b             | a             | 2 d                 |
| 4 d                        | a     | a             | a             | a                   | b             | a             | 4 d                 |
| 7 d                        | a     | ab            | b             | a                   | b             | b             | 7 d                 |
| 10 d                       | b     | a             | b             | a                   | a             | a             | 10 d                |
| nkat<br>g <sup>-1</sup> FW | APX   |               |               | MDHAR               |               |               | Days in<br>darkness |
|                            | Col-0 | <i>pad2-1</i> | <i>vtc2-1</i> | Col-0               | <i>pad2-1</i> | <i>vtc2-1</i> |                     |
| 0 d                        | b     | b             | a             | b                   | a             | a             | 0 d                 |
| 1 d                        | b     | a             | a             | b                   | b             | a             | 1 d                 |
| 2 d                        | c     | a             | b             | b                   | b             | a             | 2 d                 |
| 4 d                        | c     | a             | b             | b                   | b             | a             | 4 d                 |
| 7 d                        | b     | a             | a             | a                   | a             | a             | 7 d                 |
| 10 d                       | b     | b             | a             | a                   | a             | a             | 10 d                |
| nkat<br>g <sup>-1</sup> FW | DHAR  |               |               | Days in<br>darkness |               |               |                     |
|                            | Col-0 | <i>pad2-1</i> | <i>vtc2-1</i> |                     |               |               |                     |
| 0 d                        | a     | a             | b             | 0 d                 |               |               |                     |
| 1 d                        | a     | a             | b             | 1 d                 |               |               |                     |
| 2 d                        | b     | a             | c             | 2 d                 |               |               |                     |
| 4 d                        | b     | a             | c             | 4 d                 |               |               |                     |
| 7 d                        | a     | a             | a             | 7 d                 |               |               |                     |
| 10 d                       | a     | a             | a             | 10 d                |               |               |                     |

**Table A3**
